# Supplementary material for: Socioeconomic inequalities in COVID-19 infection and vaccine uptake among children and adolescents in Catalonia, Spain
Source: bioRxiv or medRxiv preprint supplement (doi:10.1101/2023.10.17.23297134), 2023-10-17
Supplement: Supplementary file [file media-1.pdf]

## Supplemental Online Content

**eTable 1.** Baseline characteristics of the children of Catalonia, Spain, included in the study of socioeconomic inequality in COVID-19 infection and vaccination.

**eTable 2.** Baseline characteristics of the adolescents of Catalonia, Spain included in the study of socioeconomic inequality in COVID-19 infection and vaccination.

**eTable 3.** Cumulative incidence of COVID-19 infection and vaccine coverage by cohort, overall and by sex and Socioeconomic Deprivation Index quintile.

**eTable 4.** Crude Hazard Ratios of COVID-19 infection and vaccination 3 months before and after vaccination rollout by Socioeconomic Deprivation Index quintile by SDI quintile relative to Q1, stratified by sex and previous COVID-19 infection.

**eFigure 1.** Log-log survival curves to COVID-19 infection or vaccination by Socioeconomic Deprivation Index quintile, for each study period.

**eFigure 2.** Directed Acyclic Graph modelling the relationship between socioeconomic deprivation and COVID-19 infection among children and adolescents.

**eFigure 3.** Directed Acyclic Graph modelling the relationship between socioeconomic deprivation and COVID-19 vaccine uptake among children and adolescents.

**eFigure 4.** Proportion of individuals who had performed one or more tests by age group and Socioeconomic Deprivation Index quintile, before and after the start of the vaccination rollout.

**eTable 1. Baseline characteristics of the children of Catalonia, Spain, included in the study of socioeconomic inequality in COVID-19 infection and vaccination.**

| Characteristics                           | Pre-vaccination period, Infection | Vaccination period, Infection | Vaccination period, Vaccine uptake |
|-------------------------------------------|-----------------------------------|-------------------------------|------------------------------------|
| <b>N</b>                                  | 290625                            | 276753                        | 274472                             |
| <b>Age (median [IQR])</b>                 | 8.0 [6.0, 10.0]                   | 8.0 [6.0, 10.0]               | 8.0 [6.0, 10.0]                    |
| <b>Sex No.(%)</b>                         |                                   |                               |                                    |
| Female                                    | 141020 (48.5)                     | 134520 (48.6)                 | 133468 (48.6)                      |
| Male                                      | 149605 (51.5)                     | 142233 (51.4)                 | 141004 (51.4)                      |
| <b>Nationality No.(%)</b>                 |                                   |                               |                                    |
| Spain                                     | 250644 (86.2)                     | 234209 (84.6)                 | 232036 (84.5)                      |
| Africa                                    | 12915 (4.4)                       | 13797 (5.0)                   | 13773 (5.0)                        |
| Asia & Oceania                            | 9492 (3.3)                        | 9441 (3.4)                    | 9430 (3.4)                         |
| Central & South America                   | 8802 (3.0)                        | 10577 (3.8)                   | 10544 (3.8)                        |
| Eastern Europe                            | 5487 (1.9)                        | 5251 (1.9)                    | 5225 (1.9)                         |
| Europe & North America                    | 3285 (1.1)                        | 3478 (1.3)                    | 3464 (1.3)                         |
| <b>SDI quintile No.(%)</b>                |                                   |                               |                                    |
| Q1 (least deprived)                       | 53140 (18.3)                      | 50188 (18.1)                  | 49699 (18.1)                       |
| Q2                                        | 55703 (19.2)                      | 52301 (18.9)                  | 51795 (18.9)                       |
| Q3                                        | 56850 (19.6)                      | 53707 (19.4)                  | 53234 (19.4)                       |
| Q4                                        | 60099 (20.7)                      | 57426 (20.7)                  | 56973 (20.8)                       |
| Q5 (most deprived)                        | 64833 (22.3)                      | 63131 (22.8)                  | 62771 (22.9)                       |
| <b>Previous COVID-19 Infection No.(%)</b> | 1814 (0.6)                        | 47300 (17.1)                  | 46640 (17.0)                       |

\*Values are no. (%) except as indicated. Pre-vaccination period (Sep 26 - Dec 26 2020), Vaccination period, children (15 Dec 2021 - 15 Mar 2022). Quintiles listed from least deprived (Q1) to most deprived (Q5). IQR, interquartile range; SDI, Socioeconomic Deprivation Index; COVID-19; Coronavirus Disease 2019.

**eTable 2. Baseline characteristics of the adolescents of Catalonia, Spain included in the study of socioeconomic inequality in COVID-19 infection and vaccination.**

| Characteristics                               | Pre-vaccination period,<br>Infection | Vaccination period,<br>Infection | Vaccination period,<br>Vaccine uptake |
|-----------------------------------------------|--------------------------------------|----------------------------------|---------------------------------------|
| <b>N</b>                                      | 179685                               | 175249                           | 174807                                |
| <b>Age (median [IQR])</b>                     | 13.0 [12.0, 14.0]                    | 13.0 [12.0, 14.0]                | 13.0 [12.0, 14.0]                     |
| <b>Sex No.(%)</b>                             |                                      |                                  |                                       |
| Female                                        | 87243 (48.6)                         | 84727 (48.3)                     | 84516 (48.3)                          |
| Male                                          | 92442 (51.4)                         | 90522 (51.7)                     | 90291 (51.7)                          |
| <b>Nationality No.(%)</b>                     |                                      |                                  |                                       |
| Spain                                         | 159824 (88.9)                        | 153932 (87.8)                    | 153552 (87.8)                         |
| Africa                                        | 5247 (2.9)                           | 5641 (3.2)                       | 5623 (3.2)                            |
| Asia & Oceania                                | 5065 (2.8)                           | 5329 (3.0)                       | 5316 (3.0)                            |
| Central & South<br>America                    | 4908 (2.7)                           | 5508 (3.1)                       | 5490 (3.1)                            |
| Eastern Europe                                | 3030 (1.7)                           | 3182 (1.8)                       | 3174 (1.8)                            |
| Europe & North America                        | 1611 (0.9)                           | 1657 (0.9)                       | 1652 (0.9)                            |
| <b>SDI quintile No.(%)</b>                    |                                      |                                  |                                       |
| Q1 (least deprived)                           | 34524 (19.2)                         | 32518 (18.6)                     | 32440 (18.6)                          |
| Q2                                            | 35637 (19.8)                         | 34477 (19.7)                     | 34397 (19.7)                          |
| Q3                                            | 35686 (19.9)                         | 34788 (19.9)                     | 34700 (19.9)                          |
| Q4                                            | 35994 (20.0)                         | 35595 (20.3)                     | 35495 (20.3)                          |
| Q5 (most deprived)                            | 37844 (21.1)                         | 37871 (21.6)                     | 37775 (21.6)                          |
| <b>Previous COVID-19<br/>Infection No.(%)</b> | 1039 (0.6)                           | 30323 (17.3)                     | 29958 (17.1)                          |

\*Values are no. (%) except as indicated. Pre-vaccination period (Sep 26 - Dec 26 2020), Vaccination period, adolescents (Aug 1 - Oct 1 2021). Quintiles listed from least deprived (Q1) to most deprived (Q5). IQR, interquartile range; SDI, Socioeconomic Deprivation Index; COVID-19; Coronavirus Disease 2019.

**eTable 3. Cumulative incidence of COVID-19 infection and vaccine coverage by cohort, overall and by sex and Socioeconomic Deprivation Index quintile.**

|                                             | Overall       | Q1           | Q2           | Q3           | Q4           | Q5           |
|---------------------------------------------|---------------|--------------|--------------|--------------|--------------|--------------|
| <b>Pre-vaccination rollout, Children</b>    |               |              |              |              |              |              |
| Infection No.(%)                            |               |              |              |              |              |              |
| <i>Overall</i>                              | 16773 (5.8)   | 2441 (4.6)   | 2862 (5.1)   | 3058 (5.4)   | 3867 (6.4)   | 4545 (7.0)   |
| <i>Female</i>                               | 8122 (5.8)    | 1174 (4.6)   | 1366 (5.1)   | 1488 (5.4)   | 1912 (6.6)   | 2182 (6.9)   |
| <i>Male</i>                                 | 8651 (5.8)    | 1267 (4.6)   | 1496 (5.2)   | 1570 (5.4)   | 1955 (6.3)   | 2363 (7.1)   |
| <b>Pre-vaccination rollout, Adolescents</b> |               |              |              |              |              |              |
| Infection No.(%)                            |               |              |              |              |              |              |
| <i>Overall</i>                              | 15430 (8.6)   | 2597 (7.5)   | 2908 (8.2)   | 3039 (8.5)   | 3078 (8.6)   | 3808 (10.1)  |
| <i>Female</i>                               | 7542 (8.6)    | 1261 (7.5)   | 1406 (8.1)   | 1464 (8.4)   | 1529 (8.8)   | 1882 (10.3)  |
| <i>Male</i>                                 | 7888 (8.5)    | 1336 (7.6)   | 1502 (8.2)   | 1575 (8.6)   | 1549 (8.4)   | 1926 (9.8)   |
| <b>Vaccination rollout, Children</b>        |               |              |              |              |              |              |
| Infection No.(%)                            |               |              |              |              |              |              |
| <i>Overall</i>                              | 92958 (33.6)  | 19729 (39.3) | 19501 (37.3) | 18656 (34.7) | 18334 (31.9) | 16738 (26.5) |
| <i>Female</i>                               | 44677 (33.2)  | 9436 (38.7)  | 9414 (37.2)  | 9079 (34.7)  | 8697 (31.2)  | 8051 (26.1)  |
| <i>Male</i>                                 | 48281 (33.9)  | 10293 (39.9) | 10087 (37.3) | 9577 (34.8)  | 9637 (32.6)  | 8687 (26.9)  |
| Vaccination No.(%)                          |               |              |              |              |              |              |
| <i>Overall</i>                              | 123018 (44.8) | 24970 (50.2) | 25117 (48.5) | 24743 (46.5) | 25465 (44.7) | 22723 (36.2) |
| <i>Female</i>                               | 59975 (44.9)  | 12141 (50.2) | 12173 (48.6) | 11998 (46.2) | 12484 (45.1) | 11179 (36.5) |
| <i>Male</i>                                 | 63043 (44.7)  | 12829 (50.2) | 12944 (48.4) | 12745 (46.7) | 12981 (44.3) | 11544 (35.9) |
| <b>Vaccination rollout, Adolescents</b>     |               |              |              |              |              |              |
| Infection No.(%)                            |               |              |              |              |              |              |
| <i>Overall</i>                              | 2815 (1.6)    | 408 (1.3)    | 502 (1.5)    | 527 (1.5)    | 598 (1.7)    | 780 (2.1)    |
| <i>Female</i>                               | 1466 (1.7)    | 208 (1.3)    | 266 (1.6)    | 284 (1.7)    | 293 (1.7)    | 415 (2.3)    |
| <i>Male</i>                                 | 1349 (1.5)    | 200 (1.2)    | 236 (1.3)    | 243 (1.4)    | 305 (1.7)    | 365 (1.9)    |
| Vaccination No.(%)                          |               |              |              |              |              |              |
| <i>Overall</i>                              | 126995 (72.6) | 24216 (74.6) | 25853 (75.2) | 25716 (74.1) | 25924 (73.0) | 25286 (66.9) |
| <i>Female</i>                               | 61712 (73.0)  | 11662 (74.3) | 12540 (75.5) | 12533 (74.2) | 12724 (74.1) | 12253 (67.5) |

*Male*      65283 (72.3)   12554 (75.0)   13313 (74.9)   13183 (74.0)   13200 (72.0)   13033 (66.4)

---

Pre-vaccination period (Sep 26 - Dec 26 2020), Vaccination period, adolescents (Aug 1 - Oct 1 2021), Vaccination period, children (15 Dec 2021 - 15 Mar 2022). Quintiles listed from least deprived (Q1) to most deprived (Q5). IQR, interquartile range; SDI, Socioeconomic Deprivation Index.

**eTable 4. Crude Hazard Ratios of COVID-19 infection and vaccination 3 months before and after vaccination rollout by Socioeconomic Deprivation Index quintile by SDI quintile relative to Q1, stratified by sex and previous COVID-19 infection.**

| <b>Infection, Pre-vaccination period, Children</b>    |                    |                    |                    |                                       |
|-------------------------------------------------------|--------------------|--------------------|--------------------|---------------------------------------|
|                                                       | HR (95% CI)        | HR Female (95% CI) | HR Male (95% CI)   | HR Without Previous COVID-19 (95% CI) |
| Q1 ( <i>ref.</i> )                                    | 1 [Reference]      | 1 [Reference]      | 1 [Reference]      | 1 [Reference]                         |
| Q2                                                    | 1.12 (1.06 - 1.18) | 1.12 (1.04 - 1.21) | 1.12 (1.04 - 1.21) | 1.12 (1.06 - 1.18)                    |
| Q3                                                    | 1.18 (1.12 - 1.24) | 1.18 (1.10 - 1.28) | 1.17 (1.09 - 1.26) | 1.17 (1.11 - 1.24)                    |
| Q4                                                    | 1.42 (1.35 - 1.49) | 1.46 (1.35 - 1.57) | 1.38 (1.28 - 1.48) | 1.41 (1.34 - 1.49)                    |
| Q5                                                    | 1.55 (1.47 - 1.63) | 1.54 (1.43 - 1.65) | 1.56 (1.46 - 1.67) | 1.55 (1.47 - 1.63)                    |
| <b>Infection, Pre-vaccination period, Adolescents</b> |                    |                    |                    |                                       |
|                                                       | HR (95% CI)        | HR Female (95% CI) | HR Male (95% CI)   | HR Without Previous COVID-19 (95% CI) |
| Q1 ( <i>ref.</i> )                                    | 1 [Reference]      | 1 [Reference]      | 1 [Reference]      | 1 [Reference]                         |
| Q2                                                    | 1.09 (1.03 - 1.15) | 1.08 (1.01 - 1.17) | 1.09 (1.01 - 1.17) | 1.09 (1.03 - 1.15)                    |
| Q3                                                    | 1.14 (1.08 - 1.20) | 1.13 (1.05 - 1.22) | 1.15 (1.07 - 1.23) | 1.13 (1.08 - 1.20)                    |
| Q4                                                    | 1.14 (1.08 - 1.20) | 1.18 (1.09 - 1.27) | 1.11 (1.03 - 1.20) | 1.14 (1.08 - 1.20)                    |
| Q5                                                    | 1.36 (1.29 - 1.43) | 1.40 (1.31 - 1.51) | 1.32 (1.23 - 1.41) | 1.36 (1.29 - 1.43)                    |
| <b>Infection, Vaccination period, Children</b>        |                    |                    |                    |                                       |
|                                                       | HR (95% CI)        | HR Female (95% CI) | HR Male (95% CI)   | HR Without Previous COVID-19 (95% CI) |
| Q1 ( <i>ref.</i> )                                    | 1 [Reference]      | 1 [Reference]      | 1 [Reference]      | 1 [Reference]                         |
| Q2                                                    | 0.94 (0.92 - 0.95) | 0.96 (0.93 - 0.98) | 0.92 (0.89 - 0.94) | 0.94 (0.92 - 0.96)                    |
| Q3                                                    | 0.86 (0.84 - 0.88) | 0.88 (0.85 - 0.90) | 0.84 (0.82 - 0.87) | 0.86 (0.84 - 0.87)                    |
| Q4                                                    | 0.78 (0.76 - 0.79) | 0.77 (0.75 - 0.79) | 0.78 (0.76 - 0.80) | 0.78 (0.76 - 0.79)                    |
| Q5                                                    | 0.62 (0.61 - 0.64) | 0.63 (0.61 - 0.65) | 0.62 (0.60 - 0.64) | 0.62 (0.61 - 0.64)                    |
| <b>Infection, Vaccination period, Adolescents</b>     |                    |                    |                    |                                       |
|                                                       | HR (95% CI)        | HR Female (95% CI) | HR Male (95% CI)   | HR Without Previous COVID-19 (95% CI) |
| Q1 ( <i>ref.</i> )                                    | 1 [Reference]      | 1 [Reference]      | 1 [Reference]      | 1 [Reference]                         |
| Q2                                                    | 1.16 (1.02 - 1.32) | 1.21 (1.01 - 1.45) | 1.11 (0.92 - 1.34) | 1.13 (0.98 - 1.30)                    |
| Q3                                                    | 1.21 (1.06 - 1.38) | 1.27 (1.06 - 1.52) | 1.14 (0.95 - 1.38) | 1.19 (1.03 - 1.36)                    |
| Q4                                                    | 1.34 (1.18 - 1.52) | 1.29 (1.08 - 1.54) | 1.40 (1.17 - 1.67) | 1.35 (1.18 - 1.55)                    |
| Q5                                                    | 1.65 (1.46 - 1.86) | 1.73 (1.47 - 2.05) | 1.56 (1.31 - 1.86) | 1.60 (1.41 - 1.82)                    |
| <b>Vaccination, Vaccination period, Children</b>      |                    |                    |                    |                                       |
|                                                       | HR (95% CI)        | HR Female (95% CI) | HR Male (95% CI)   | HR Without Previous COVID-19 (95% CI) |
| Q1 ( <i>ref.</i> )                                    | 1 [Reference]      | 1 [Reference]      | 1 [Reference]      | 1 [Reference]                         |

|    |                    |                    |                    |                    |
|----|--------------------|--------------------|--------------------|--------------------|
| Q2 | 0.92 (0.91 - 0.94) | 0.93 (0.90 - 0.95) | 0.92 (0.90 - 0.94) | 0.92 (0.91 - 0.94) |
| Q3 | 0.85 (0.84 - 0.87) | 0.85 (0.83 - 0.87) | 0.86 (0.83 - 0.88) | 0.85 (0.84 - 0.87) |
| Q4 | 0.79 (0.78-0.81)   | 0.80 (0.78 - 0.82) | 0.78 (0.76 - 0.80) | 0.79 (0.78-0.81)   |
| Q5 | 0.58 (0.57 - 0.59) | 0.59 (0.57 - 0.60) | 0.58 (0.56 - 0.59) | 0.57 (0.56 - 0.58) |

---

**Vaccination, Vaccination period, Adolescents**

|                    | HR (95% CI)        | HR Female (95% CI) | HR Male (95% CI)   | HR Without Previous COVID-19 (95% CI) |
|--------------------|--------------------|--------------------|--------------------|---------------------------------------|
| Q1 ( <i>ref.</i> ) | 1 [Reference]      | 1 [Reference]      | 1 [Reference]      | 1 [Reference]                         |
| Q2                 | 1.02 (1.00 - 1.04) | 1.03 (1.01 - 1.06) | 1.01 (0.99 - 1.03) | 1.02 (1.00 - 1.04)                    |
| Q3                 | 0.98 (0.97 - 1.00) | 0.99 (0.97 - 1.02) | 0.98 (0.95 - 1.00) | 0.98 (0.96 - 1.00)                    |
| Q4                 | 0.94 (0.93 - 0.96) | 0.98 (0.95 - 1.00) | 0.91 (0.89 - 0.94) | 0.94 (0.92 - 0.96)                    |
| Q5                 | 0.79 (0.77 - 0.80) | 0.81 (0.79 - 0.83) | 0.77 (0.75 - 0.79) | 0.77 (0.76 - 0.79)                    |

Quintiles listed from least deprived (Q1) to most deprived (Q5). SDI, Socioeconomic Deprivation Index; COVID-19; Coronavirus Disease 2019. Pre-vaccination period (Sep 26 - Dec 26 2020), Vaccination period, adolescents (Aug 1 - Oct 1 2021), Vaccination period, children (15 Dec 2021 - 15 Mar 2022).

**eFigure 1. Log-log survival curves to COVID-19 infection or vaccination by Socioeconomic Deprivation Index quintile, for each study period.**

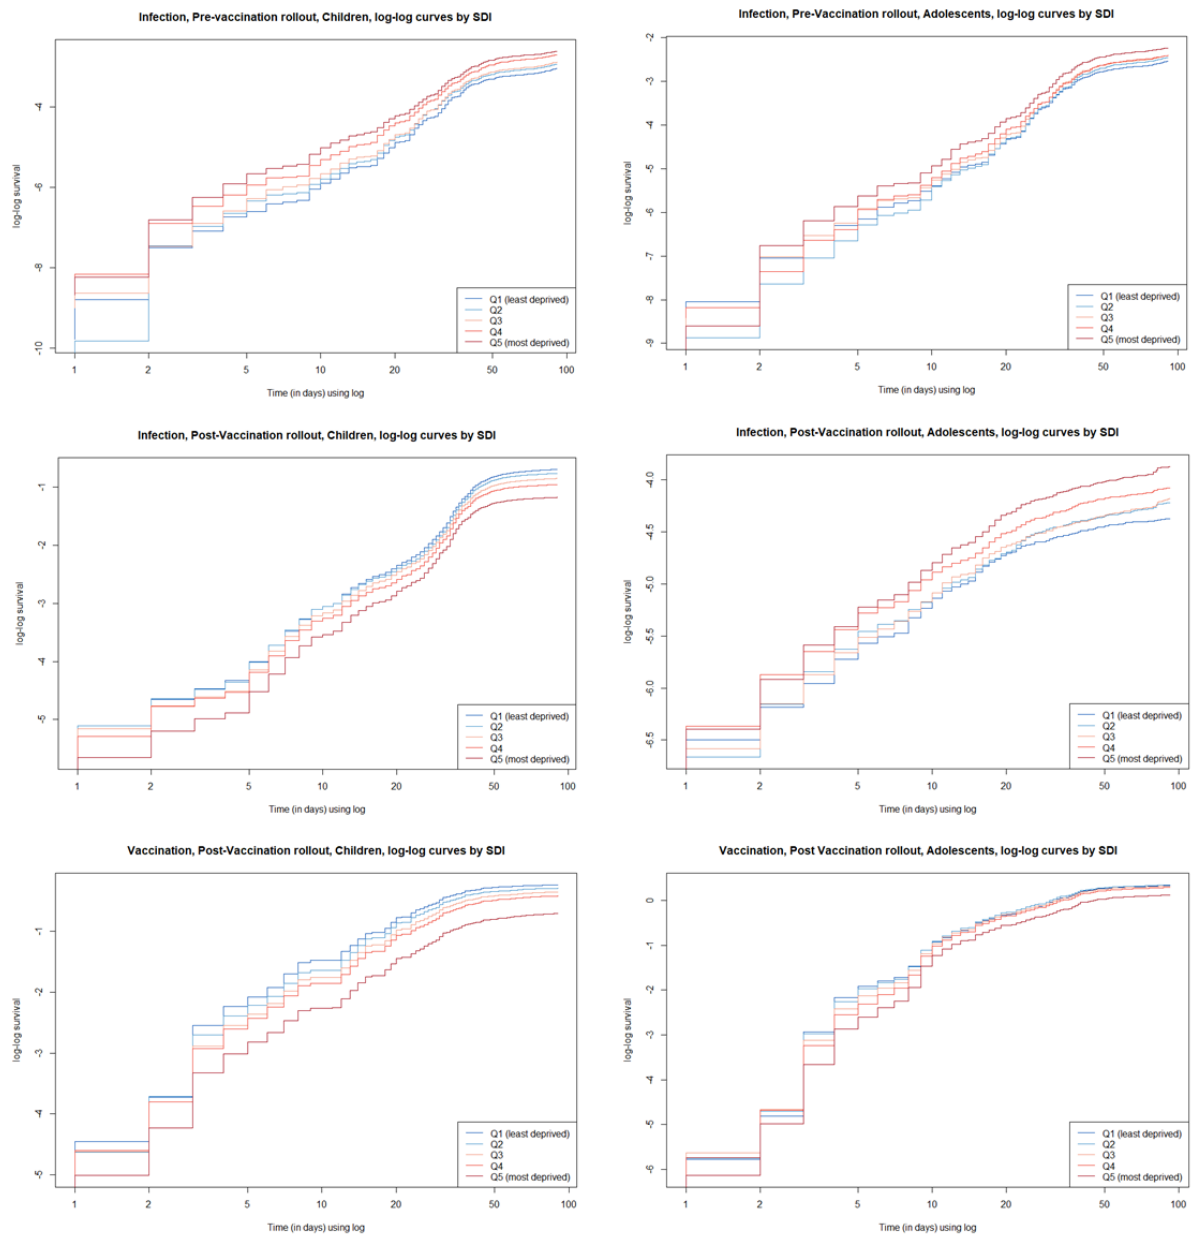

Pre-vaccination period (Sep 26 - Dec 26 2020), Vaccination period, adolescents (Aug 1 - Oct 1 2021), Vaccination period, children (15 Dec 2021 - 15 Mar 2022). Quintiles listed from least deprived (Q1) to most deprived (Q5). IQR, interquartile range; SDI, Socioeconomic Deprivation Index



**eFigure 2. Directed Acyclic Graph modelling the relationship between socioeconomic deprivation and COVID-19 infection among children and adolescents.**

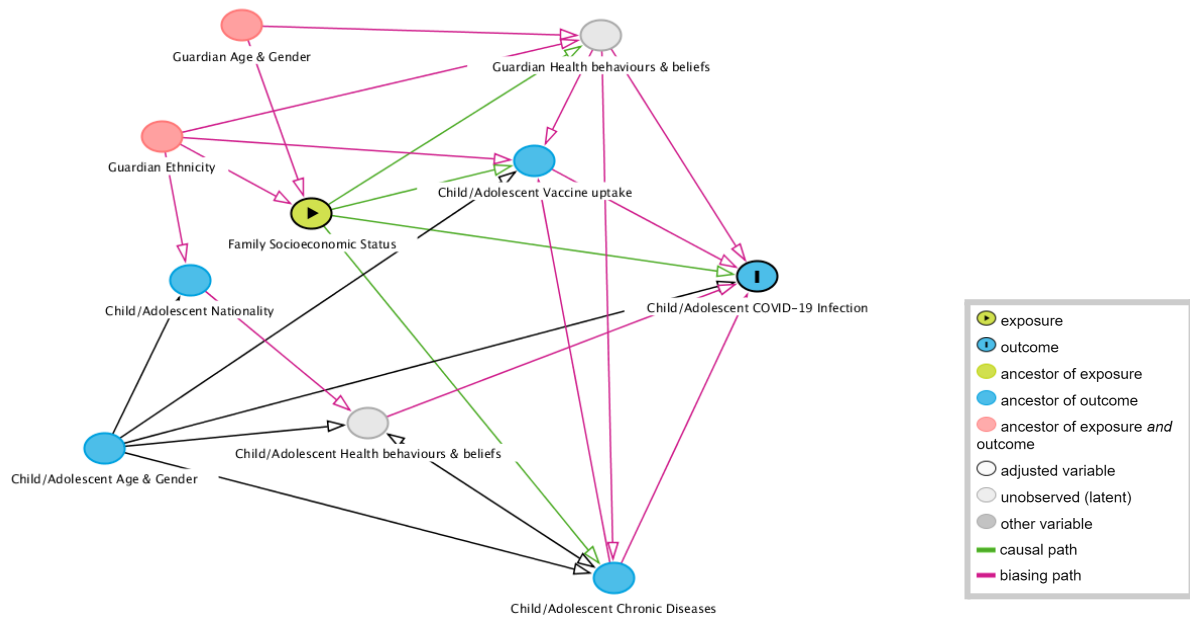

COVID-19; Coronavirus Disease 2019

**eFigure 3. Directed Acyclic Graph modelling the relationship between socioeconomic deprivation and COVID-19 vaccine uptake among children and adolescents.**

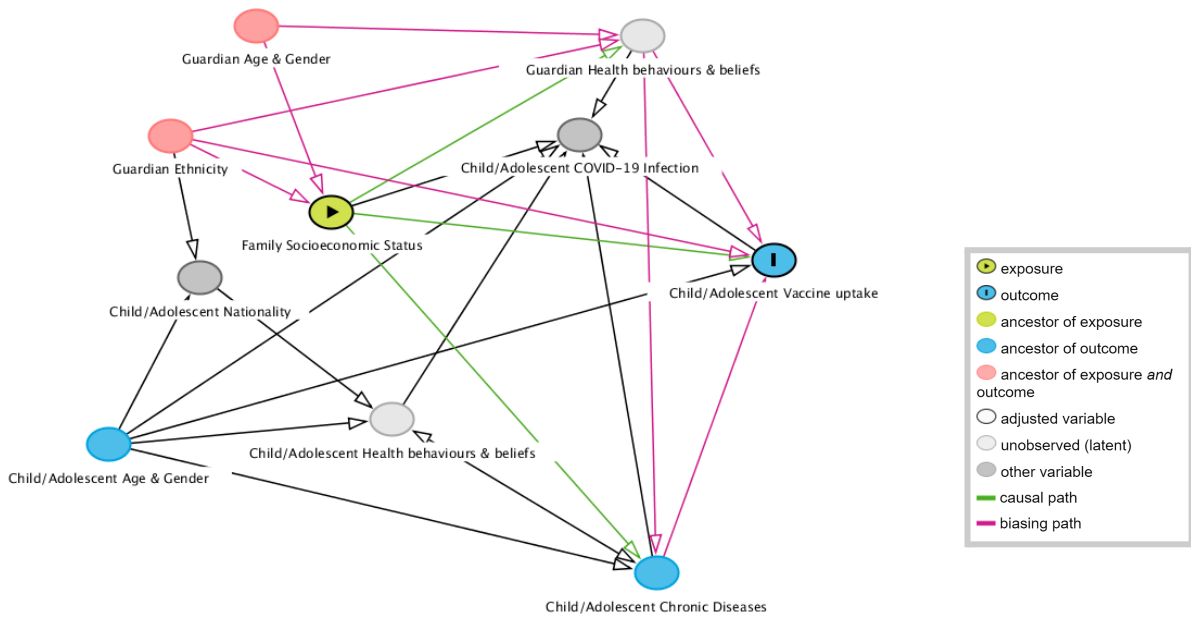

COVID-19; Coronavirus Disease 2019

**eFigure 4. Proportion of individuals who had performed one or more tests by age group and Socioeconomic Deprivation Index quintile, before and after the start of the vaccination rollout.**

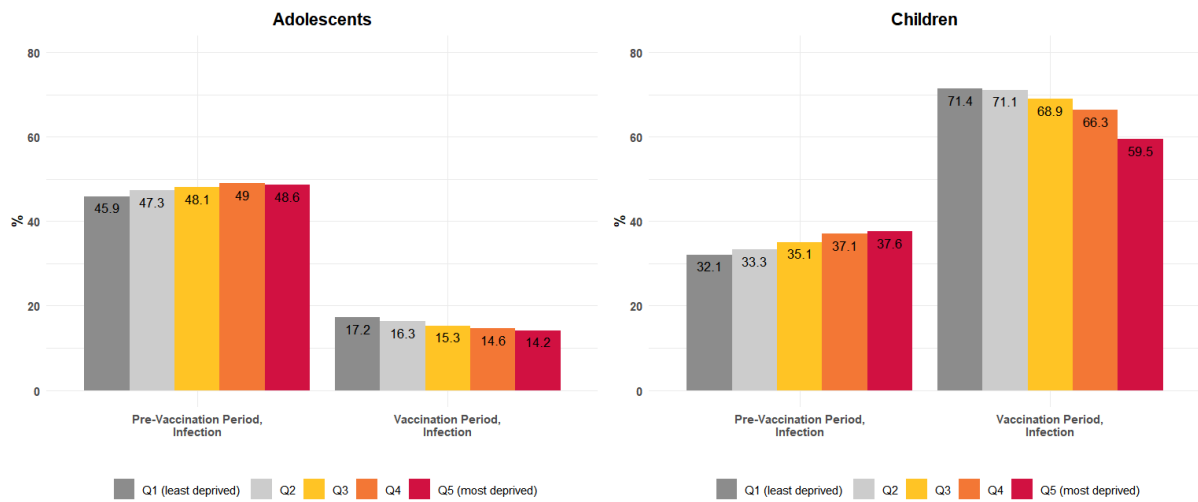

Quintiles listed from least deprived (Q1) to most deprived (Q5). SDI, Socioeconomic Deprivation Index. Pre-vaccination period (Sep 26 - Dec 26 2020), Vaccination period, adolescents (Aug 1 - Oct 1 2021), Vaccination period, children (15 Dec 2021 - 15 Mar 2022).
